# Supplementary material
Source: PubMed Central journal article supplement (PMC3982505)
Supplement: mt2013300x1.pdf [file mt2013300x1.pdf]

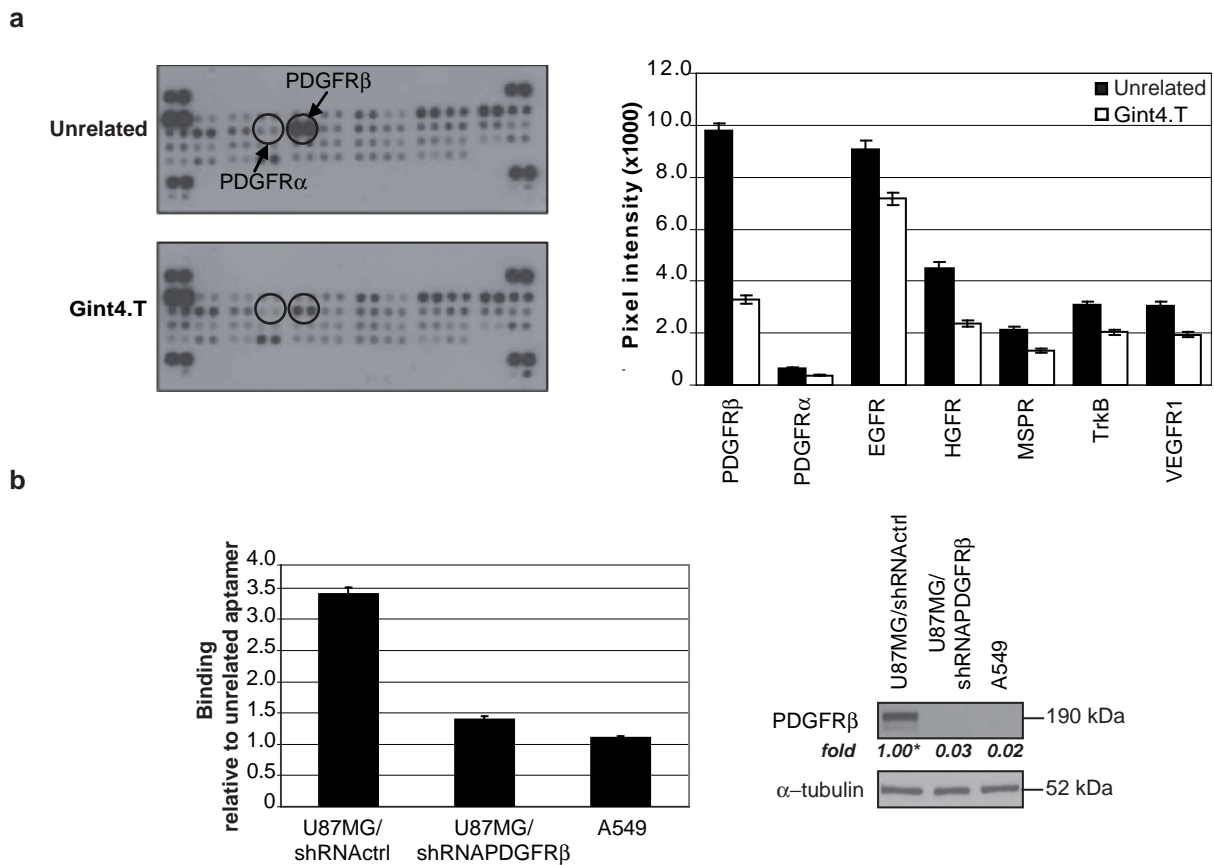

**Figure S1. Gint4.T specifically interacts with PDGFR $\beta$ .** (a) U87MG cells were serum starved overnight and then incubated with culture medium supplemented with 20% FBS for 10 minutes in the presence of 200nM Gint4.T or the unrelated aptamer and cell extracts were prepared. 200  $\mu$ g-lysates were incubated on RTK antibody arrays. Phosphorylation levels were determined by subsequent incubation with anti-phosphotyrosine horseradish peroxidase. Arrows indicate phosphorylated PDGFR $\beta$  and PDGFR $\alpha$ . The pixel intensity associated to the phosphorylation status of the receptors whose serum-dependent activation is altered following Gint4.T treatment is reported and error bars depict means  $\pm$  SD. (n = 4). (b) Left, binding of 100 nM radiolabeled Gint4.T to U87MG cells following 72 h-transfection with a specific PDGFR $\beta$  short hairpin RNA (U87MG/shRNAPDGFR $\beta$ ) or a nonrelated shRNA (U87MG/shRNActrl), or to A549 cells. Right, lysates from transfected U87MG or A549 cells were immunoblotted with anti-PDGFR $\beta$  antibodies. Values below the blot indicate signal levels relative to shRNActrl-transfected cells, arbitrarily set to 1 (labeled with asterisk). Equal loading was confirmed by immunoblot with anti- $\alpha$ -tubulin antibody. Molecular weights of indicated proteins are reported. The results are expressed relative to the background binding detected with the unrelated aptamer. Error bars depict means  $\pm$  SD. (n = 3).

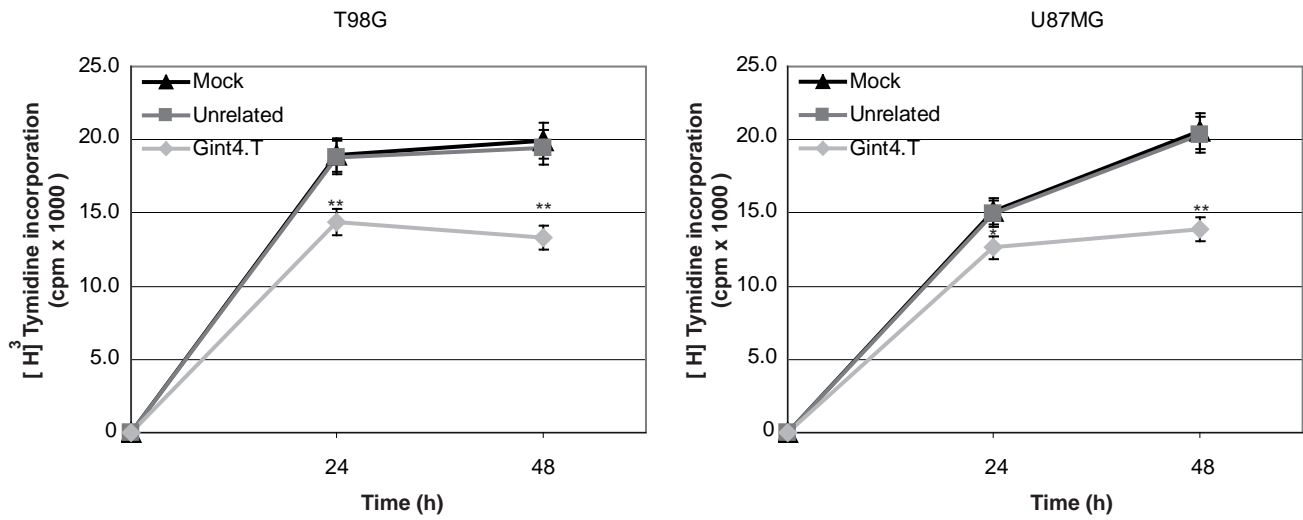

**Figure S2. Gint4.T reduces [<sup>3</sup>H]-thymidine incorporation.** T98G and U87MG cells were either mock-treated or treated for 24 and 48 hours with Gint4.T or the unrelated aptamer and proliferation was determined by [<sup>3</sup>H]-thymidine incorporation. \*\*, p<0.005; \*, p<0.05 relative to unrelated (n=6).

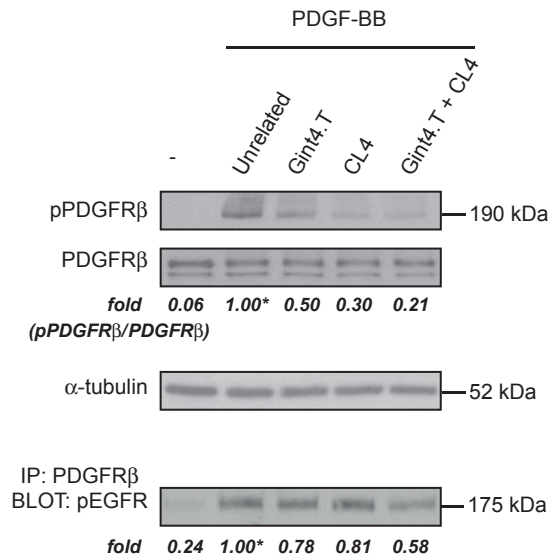

**Figure S3. Gint4.T cooperates with CL4 in preventing EGFR transactivation in U87MG cells.** Serum-starved U87MG cells were either left untreated or stimulated with PDGF-BB in the presence of Gint4.T, CL4, Gint4.T plus CL4, or the unrelated aptamer. Cell lysates were either immunoblotted with anti-pPDGFR $\beta$  and anti-PDGFR $\beta$  antibodies or immunoprecipitated with anti-PDGFR $\beta$  antibody and immunoblotted with anti-pEGFR, as indicated. Equal loading was confirmed by immunoblot with anti  $\alpha$ -tubulin antibody. Values below the blots indicate signal levels relative to PDGF-BB stimulated cells in the presence of the unrelated aptamer, arbitrarily set to 1 (labeled with asterisk). Molecular weights of indicated proteins are reported.

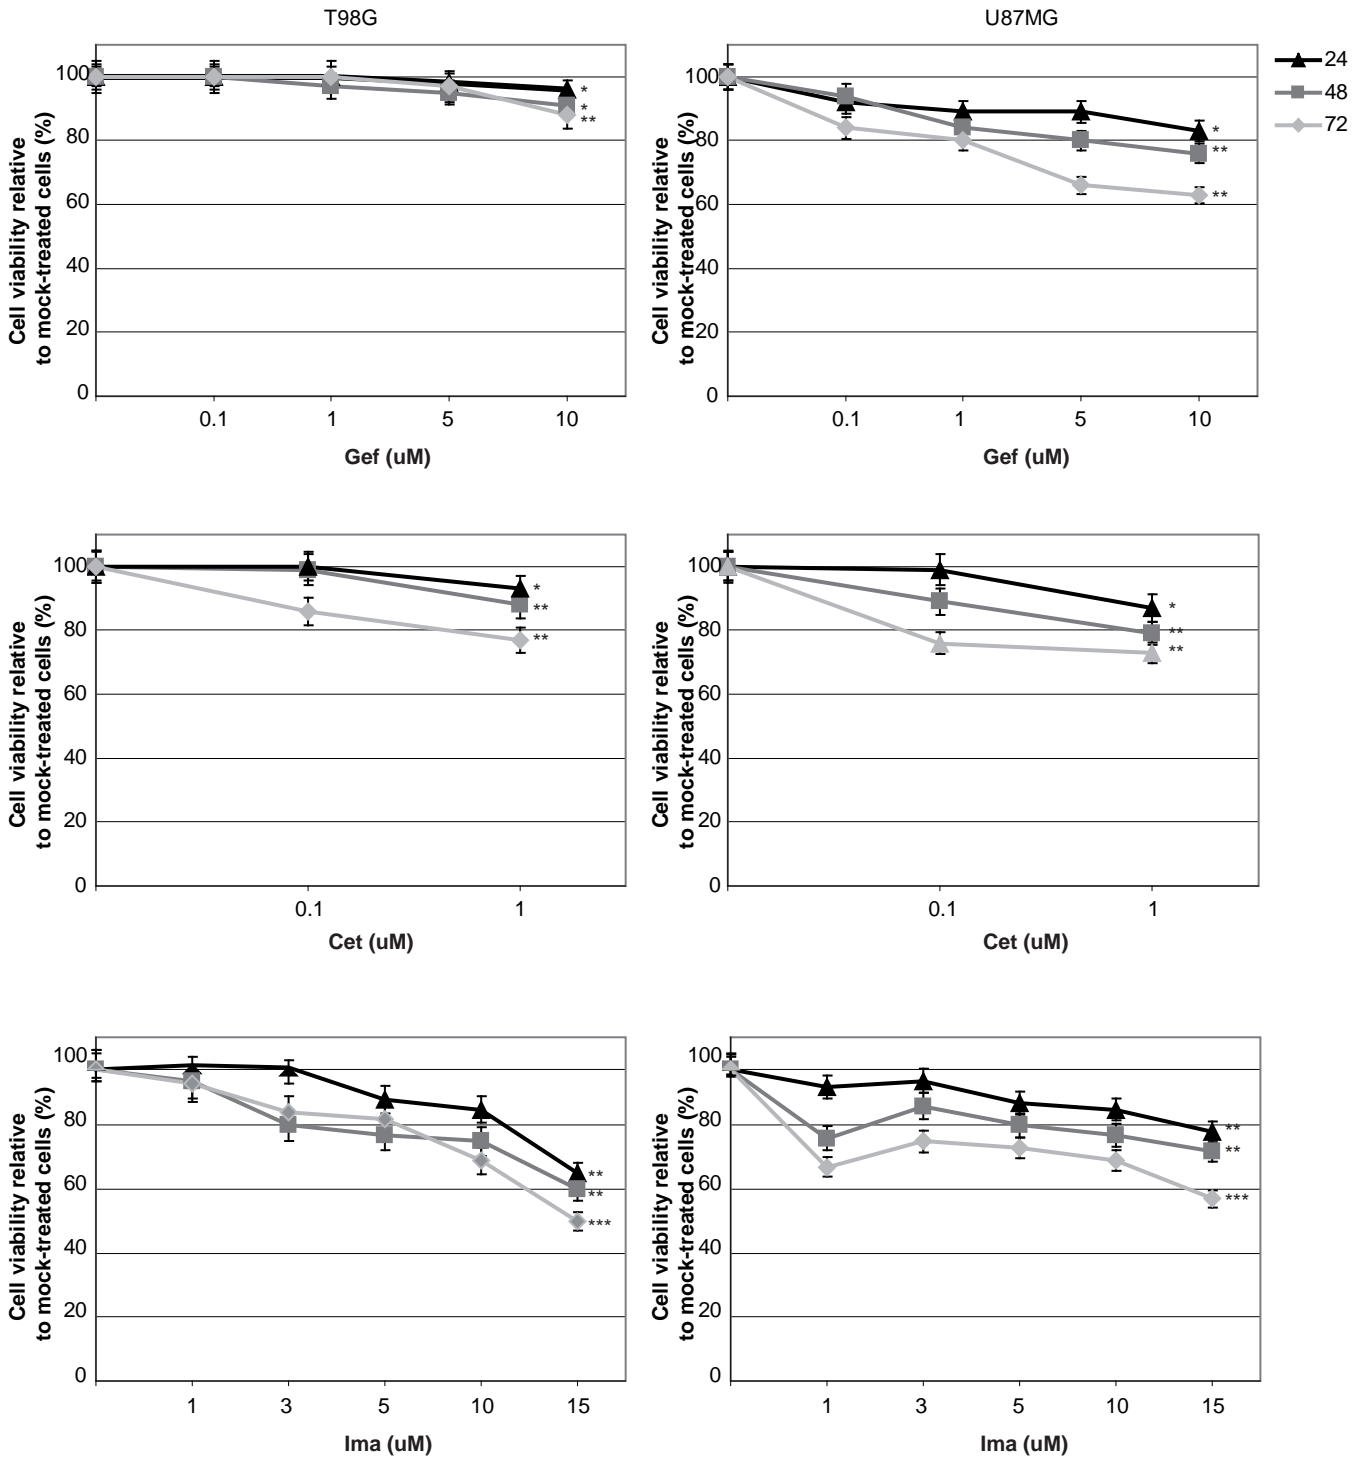

**Figure S4. Effect of Gefitinib (Gef), Cetuximab (Cet) and Imatinib (Ima) on cell viability.**

T98G and U87MG cells were either mock-treated or treated for 72 hours with increasing concentrations of the three inhibitors, as indicated. \*\*\*,  $p < 0.0001$ ; \*\*,  $p < 0.005$ ; \*,  $p < 0.05$  relative to mock-treated ( $n=6$ ). Error bars depict means  $\pm$  SD.

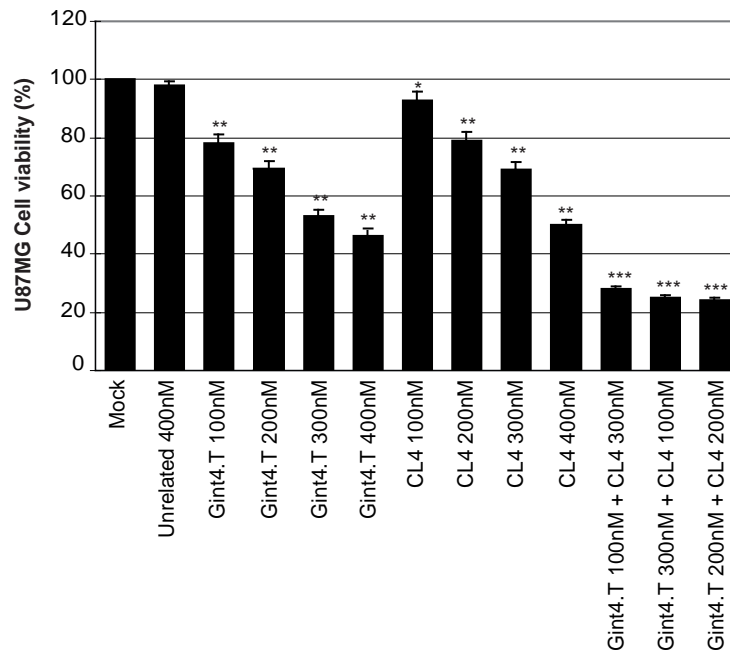

**Figure S5. Combined effect of Gint4.T and CL4 on cell viability.** U87MG cells were either mock-treated or treated for 72 hours with Gint4.T, CL4, Gint4.T plus CL4 or the unrelated aptamer, as indicated. \*\*\*,  $p < 0.0001$ ; \*\*,  $p < 0.005$ ; \*,  $p < 0.05$  relative to mock-treated ( $n=6$ ). Error bars depict means  $\pm$  SD.
